# Supplementary material for: Effects of Gas Type, Oil, Salts and Detergent on Formation and Stability of Air and Carbon Dioxide Bubbles Produced by Using a Nanobubble Generator
Source: MDPI journal article supplement (doi:10.3390/nano13091496), 2023-04-27
Supplement: s1 [file s1]

# Effects of Gas Type, Oil, Salts and Detergent on Formation and Stability of Air and Carbon Dioxide Bubbles Produced by Using a Nanobubble Generator

Kaiyu Zhou <sup>1</sup>, Vincent Maugard <sup>1</sup>, Wenming Zhang <sup>2</sup>, Joe Zhou <sup>3</sup>, Xuehua Zhang <sup>1,\*</sup>

<sup>1</sup> Department of Chemical and Materials Engineering, University of Alberta, Alberta T6G 1H9, Canada

<sup>2</sup> Department of Civil and Environmental Engineering, University of Alberta, Alberta T6G 2W2, Canada

<sup>3</sup> Disruptive Separation Technology Ltd.(DSTL), Edmonton, Alberta T6X 1M5, Canada

\* Correspondence: xuehua.zhang@ualberta.ca

**Table S1.** Compositions and physicochemical properties of substances [1-2].

| Detergent (Decon Labs. Inc) |              | Tap water                                       |       |
|-----------------------------|--------------|-------------------------------------------------|-------|
| Composition                 | % in product | Parameter                                       | Value |
| Water                       | 60-65        | pH                                              | 7.8   |
| LES-ME 27                   | 19-23        | Turbidity (NTU)                                 | 0.05  |
| Colateric COAB              | Trace        | Total Organic Carbon (mg/L C)                   | 1.6   |
| PEG-75 Lanolin              | Trace        | Conductivity ( $\mu\text{S}/\text{cm}$ )        | 382   |
| Citric Acid                 | Trace        | Alkalinity Total (mg $\text{CaCO}_3/\text{L}$ ) | 121   |
|                             |              | Total Chlorine (mg/L)                           | 2.06  |

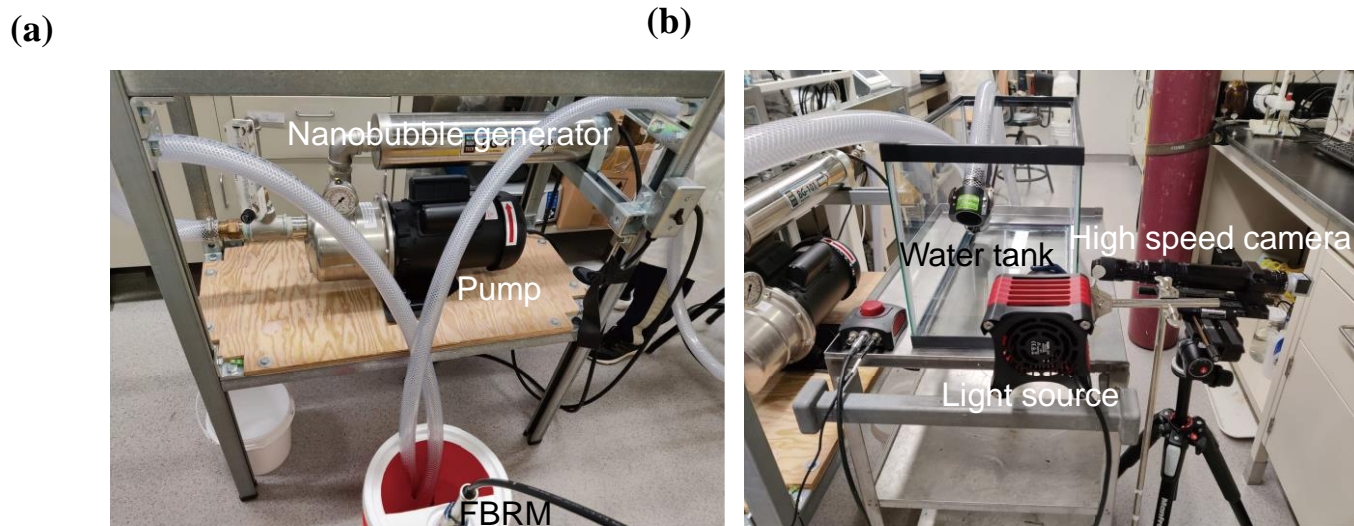

**Figure S1.** Pictures of (a) nanobubble generator system, and (b) high-speed camera setup for visualization of bubbles generated in the water tank.

**References**

1. <https://deconlabs.com/products/skin-care-bacdown-handsoap/>
2. [https://www.epcor.com/products-services/water/water-quality/Pages/water-quality-reports-edmonton.aspx#/waterworks\\_](https://www.epcor.com/products-services/water/water-quality/Pages/water-quality-reports-edmonton.aspx#/waterworks_)
